# Supplementary material for: Linear and Nonlinear Photon-Induced Cross Bridge/Space Charge Transfer in STC Molecular Crystals
Source: MDPI journal article supplement (doi:10.3390/nano12030535), 2022-02-04
Supplement: s1 [file s1]

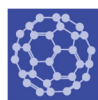

## Article

# Linear and Nonlinear Photon-Induced Cross Bridge/Space Charge Transfer in STC Molecular Crystals

Chen Lu <sup>1</sup>, Jing Yu <sup>1</sup>, Hao Sheng <sup>1,\*</sup>, Yongjian Jiang <sup>1</sup>, Fengyang Zhao <sup>2</sup> and Jingang Wang <sup>1,\*</sup>

<sup>1</sup> College of Science, Liaoning Petrochemical University, Fushun 113001, China; luchen@stu.lnpu.edu.cn (C.L.); yujing3657@sina.com (J.Y.); xiao.jian.happy@163.com (Y.J.)

<sup>2</sup> College of Chemistry and Material Science, Liaoning Petrochemical University, Fushun 113001, China; a406280751@163.com

\* Correspondence: shenghao@lnpu.edu.cn (H.S.); jingang\_wang@lnpu.edu.cn (J.W.)

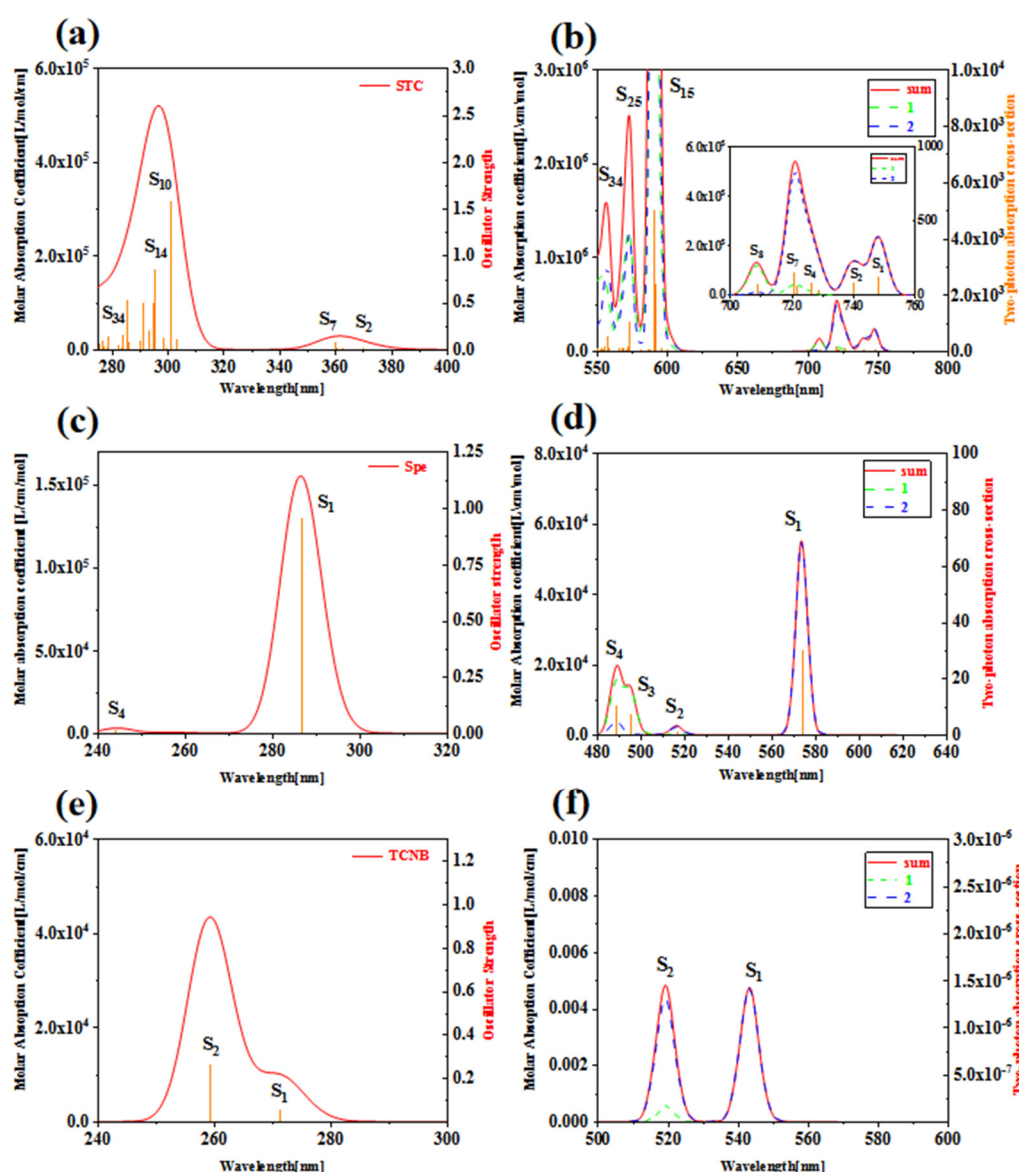

Figure S1. OPA and TPA spectra of STC (a, b), monomer Spe (c, d) and monomer TCNB (e, f).

**Citation:** Lu, C.; Yu, J.; Sheng, H.; Jiang, Y.; Zhao, F.; Wang, J. Linear and Nonlinear Photon-Induced Cross Bridge/Space Charge Transfer in STC Molecular Crystals. *Nanomaterials* **2022**, *12*, 535. <https://doi.org/10.3390/nano12030535>

Academic Editor: Rodolphe Antoine

Received: 9 January 2022

Accepted: 2 February 2022

Published: 4 February 2022

**Publisher's Note:** MDPI stays neutral with regard to jurisdictional claims in published maps and institutional affiliations.

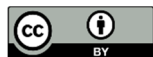

**Copyright:** © 2022 by the authors. Licensee MDPI, Basel, Switzerland. This article is an open access article distributed under the terms and conditions of the Creative Commons Attribution (CC BY) license (<https://creativecommons.org/licenses/by/4.0/>).

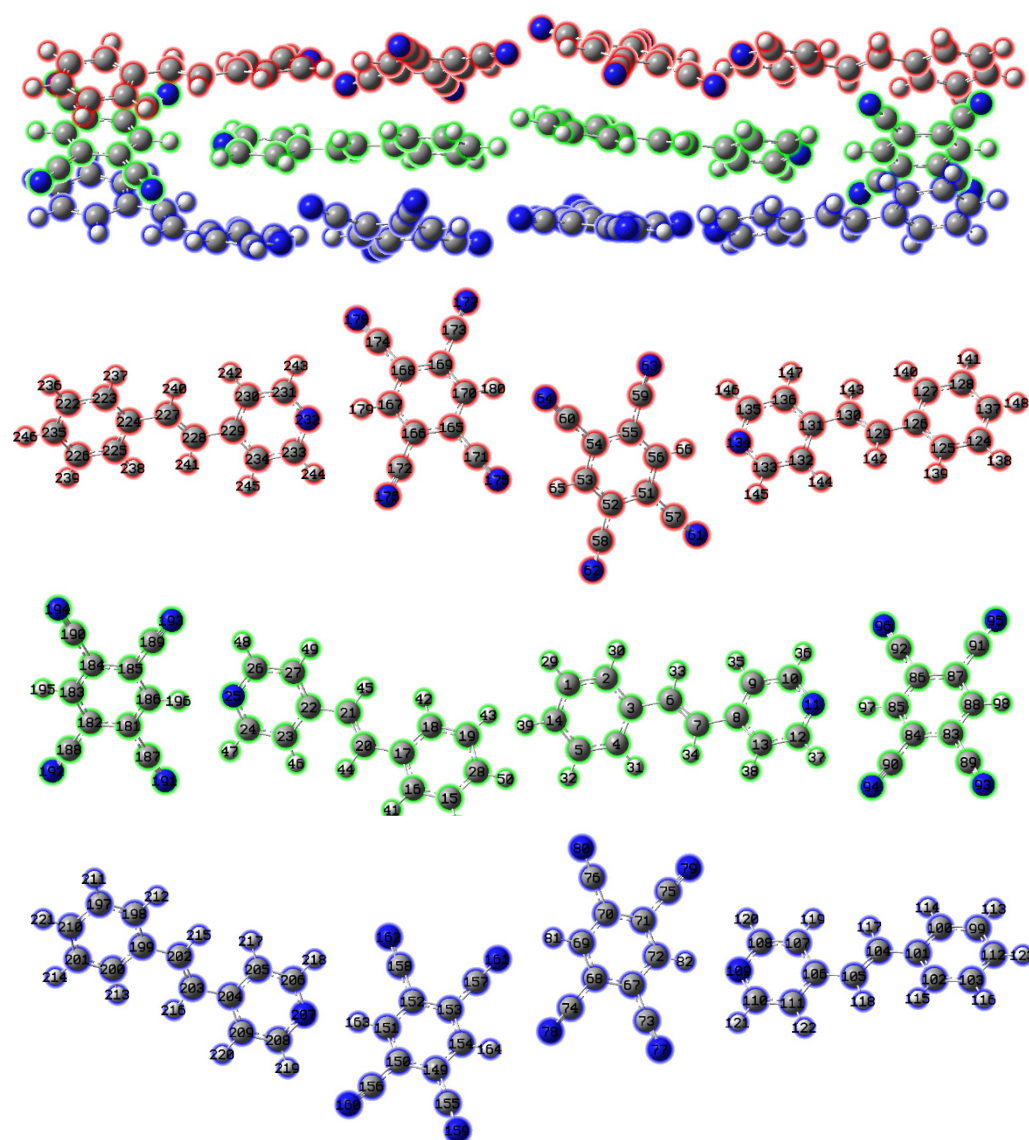

Figure S2. Atomic numbers in STC co-crystals.

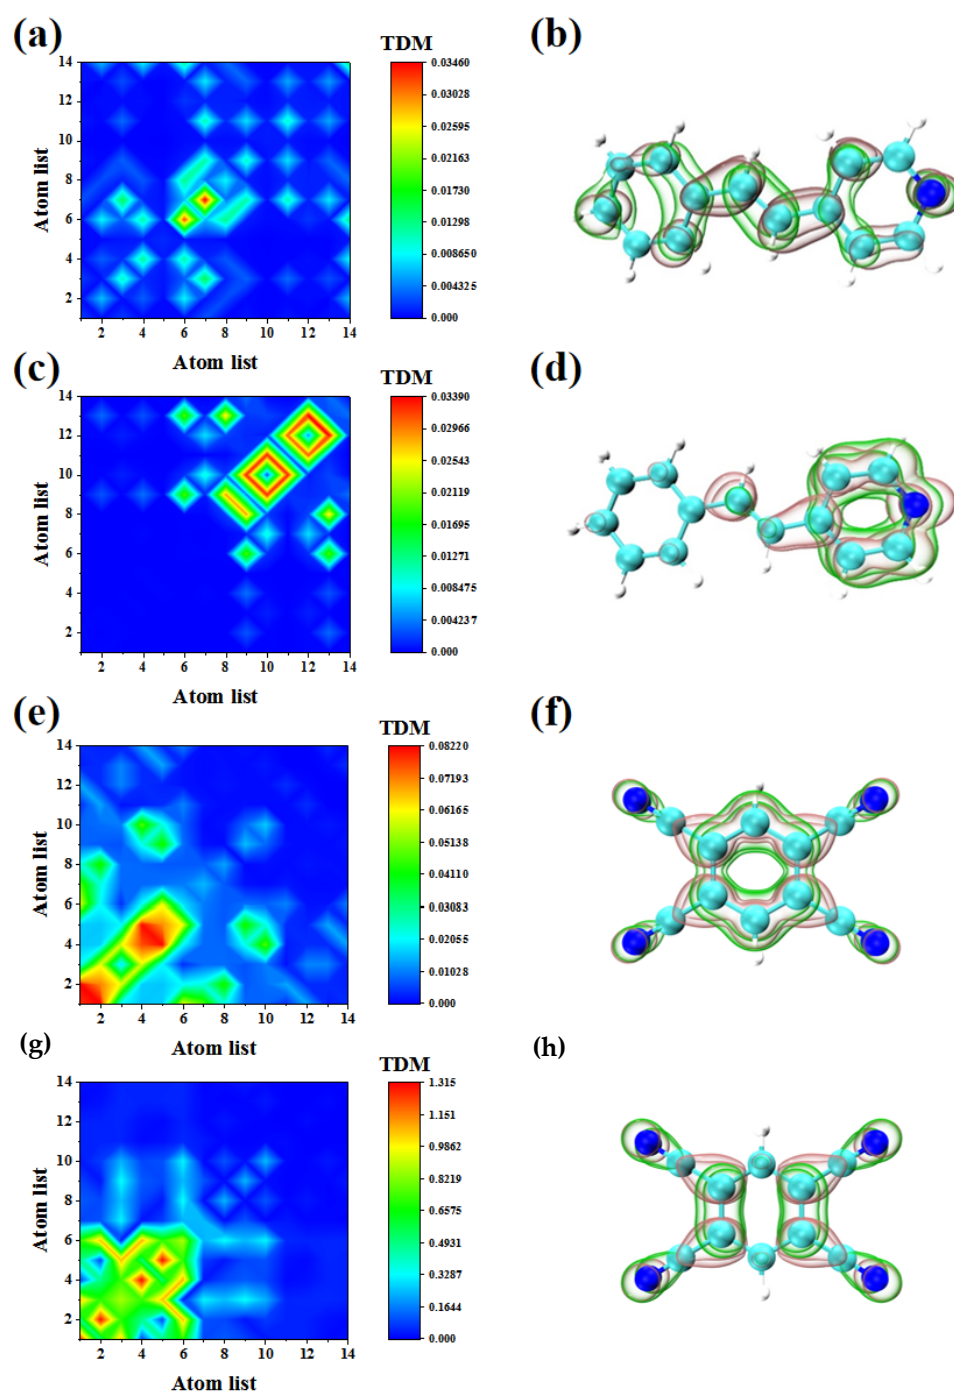

**Figure S3.** The monomer Spe's TDM and electron-hole pairs density of  $S_1$  (a, b) and  $S_4$  (c, d); the monomer TCNB's TDM and electron-hole pairs density of  $S_1$  (e, f) and  $S_2$  (g, h).
